# Supplementary material
Source: PubMed Central journal article supplement (PMC8563438)

**Supplemental Figures**

**Figure 3 Overall Survival: A. Patients Diagnosed with M0 Prostate Cancer; B. Patients Diagnosed with De Novo M1 Prostate Cancer**

**A. Patients diagnosed with M0 prostate cancer**

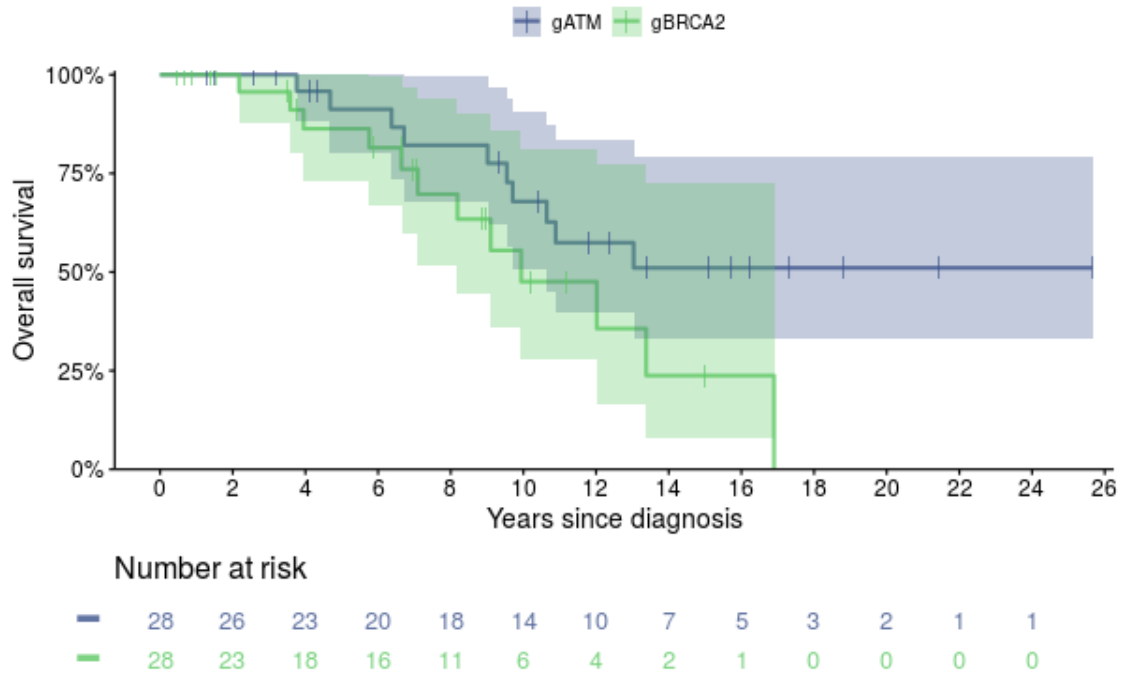

**B. Patients diagnosed with de novo M1 prostate cancer**

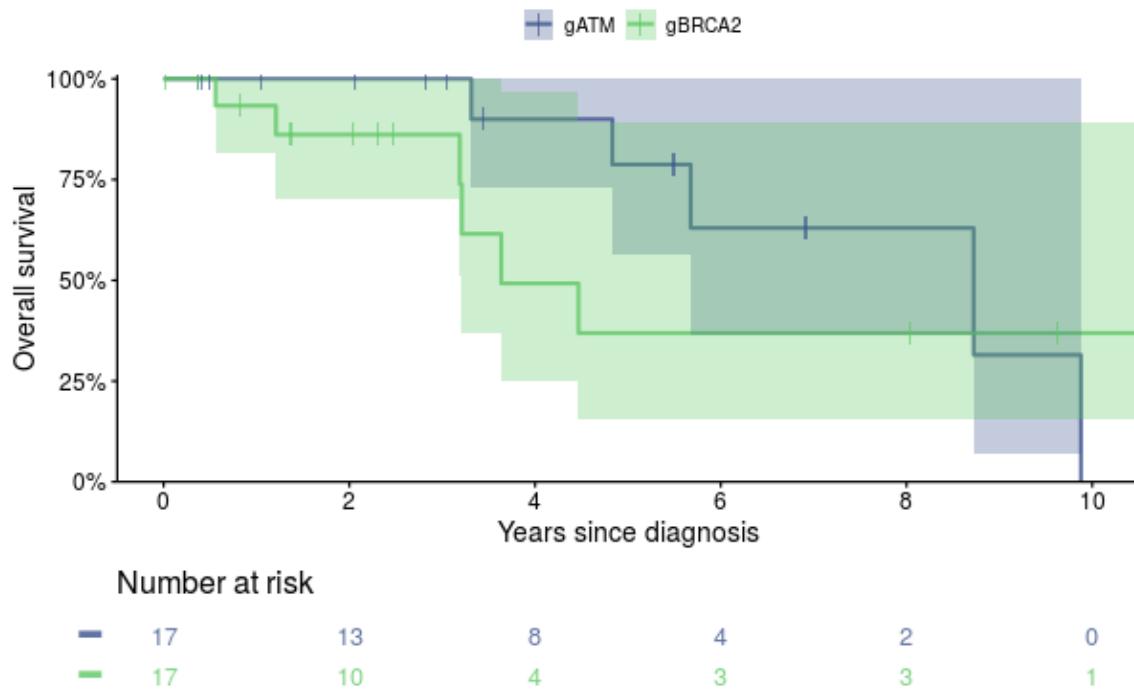

**Figure 4. Metastasis-free Survival for Patients Diagnosed with M0 Prostate Cancer**

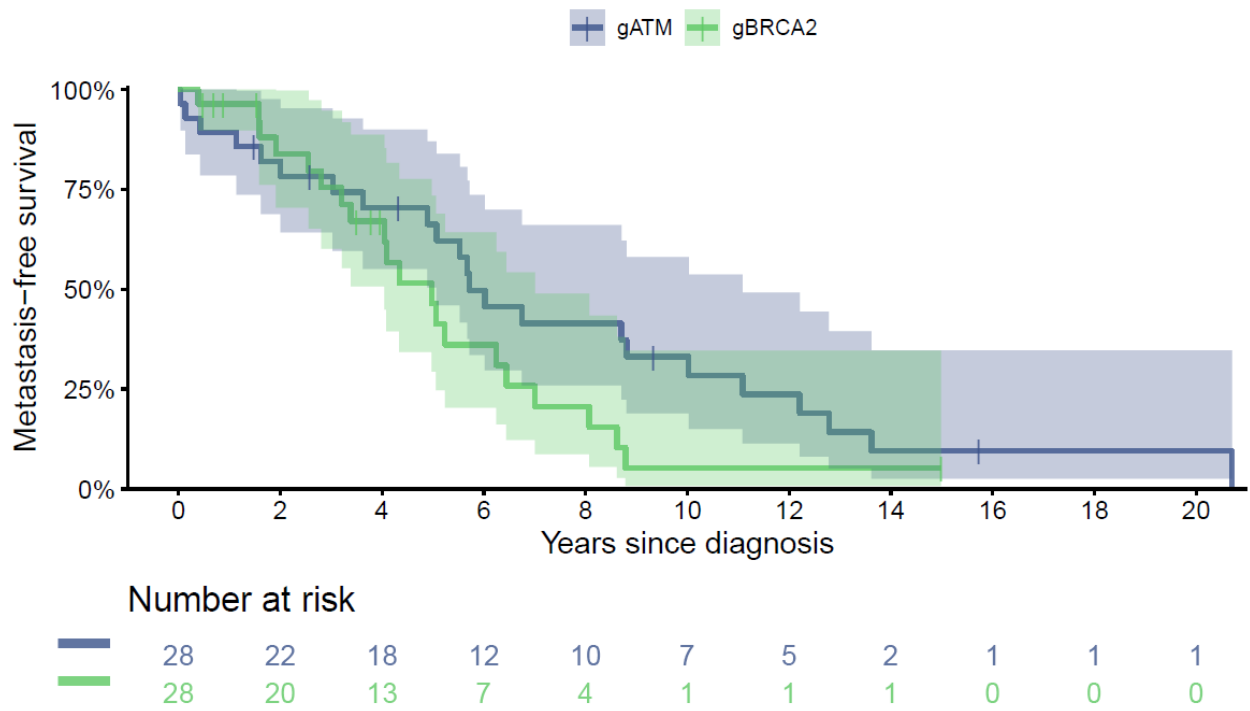

**Table 3. Comparison of Presented Cohort with Prior Published Population Study by Castro, et al.<sup>5</sup>**

| Characteristics       | Presented Study |                 | Population Study |                  |
|-----------------------|-----------------|-----------------|------------------|------------------|
|                       | gATM            | gBRCA2          | gBRCA2           | Non-carriers     |
| Number of patients    | 45              | 45              | 61               | 1940             |
| Age (range)           | 58 [44-81]      | 62 [40-75]      | 57.6 (41.7-88)   | 57.2 (32.3-88.9) |
| PSA (range)           | 23.7 [1.5-2555] | 10.8 [1.31-750] | 15.1 (0.5-761)   | 11.3 (0.3-7.800) |
| Gleason Grade 2 (%)   | 6 (13.3)        | 4 (8.9)         | 15 (24.6)        | 511 (26.3)       |
| Gleason Grade > 3 (%) | 29 (64.5%)      | 33 (73.3%)      | 23 (37.7)        | 299 (15.4)       |

**Figure 5 Time on mCRPC Therapy with A. Abiraterone; B. Enzalutamide; C. Docetaxel; D. Platinum; E. PARPi**

A) Abiraterone

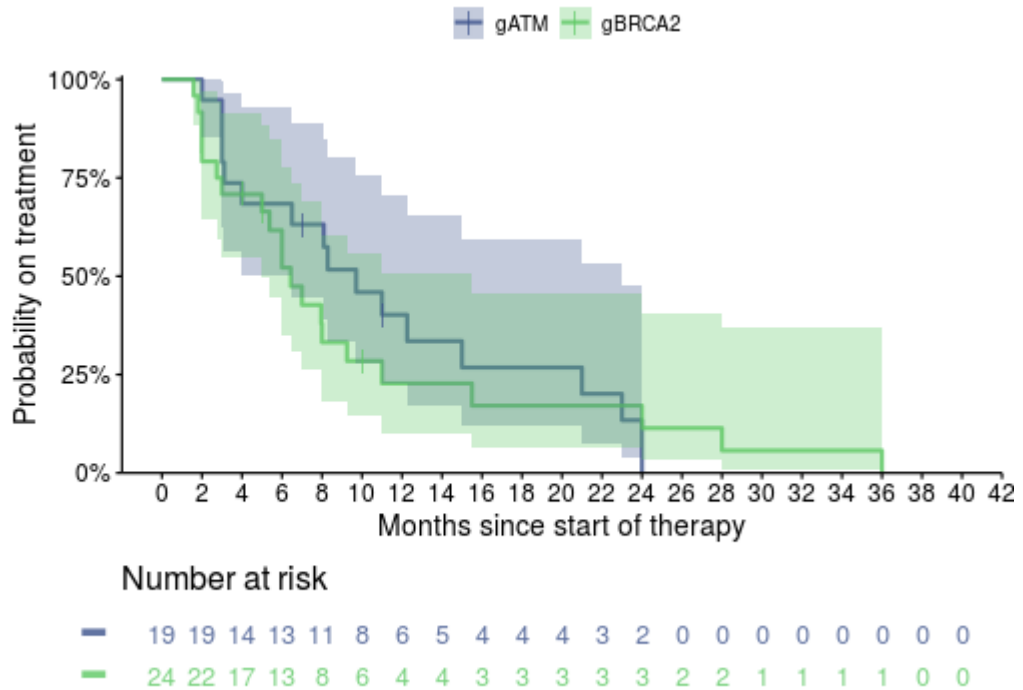



D) Platinum

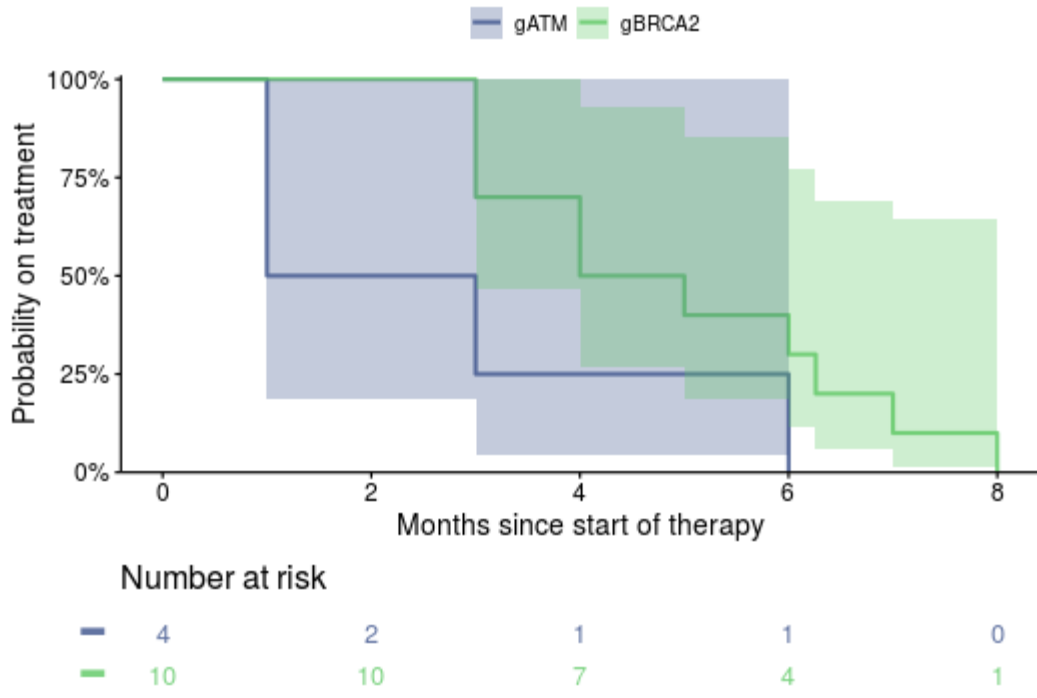

E) PARPi

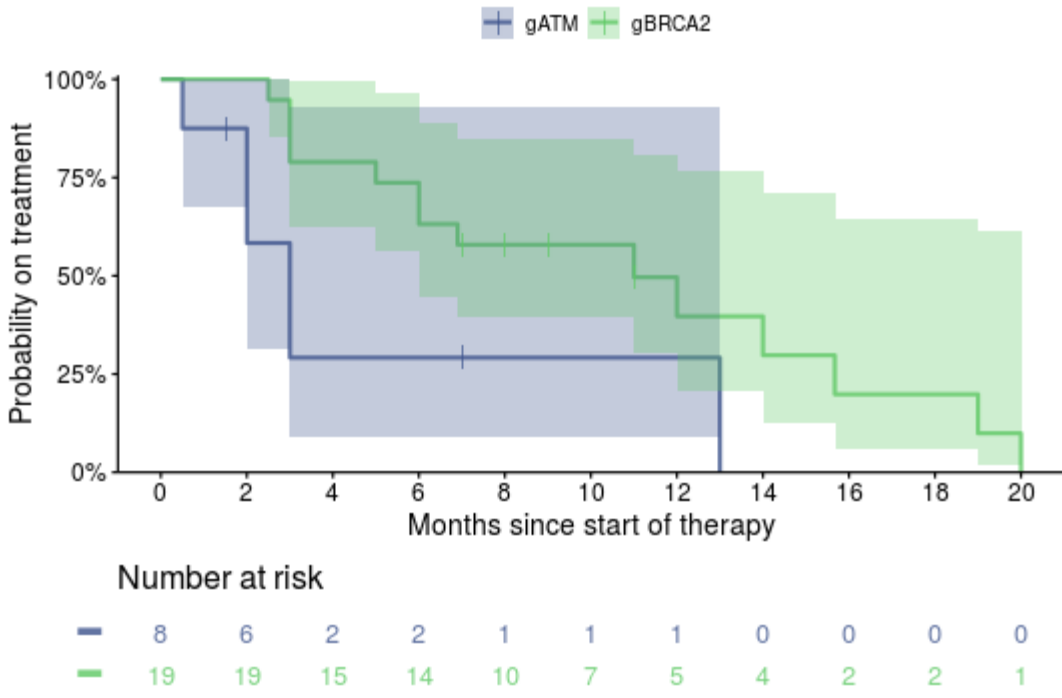

Supplement: NIHMS1738743-supplement-1.pdf [file NIHMS1738743-supplement-1.pdf]
